# Supplementary material
Source: MDPI journal article supplement (https://www.mdpi.com/2073-4433/12/10/1322)
Supplement: s1 [file s1]

## Supplementary Materials:

# Investigation of Air Pollutants Related to the Vehicular Exhaust Emissions in the Kathmandu Valley, Nepal

Yukiko Fukusaki <sup>1,\*</sup>, Masataka Umehara <sup>1</sup>, Yuka Kousa <sup>1</sup>, Yoshimi Inomata <sup>1</sup> and Satoshi Nakai <sup>2</sup>

<sup>1</sup> Yokohama Environmental Science Research Institute, Yokohama 221-0024, Kanagawa, Japan; ma05-umehara@city.yokohama.jp (M.U.); yu01-kousa@city.yokohama.jp (Y.K.); yo03-inomata@city.yokohama.jp (Y.I.)

<sup>2</sup> Department of Artificial Environment, Graduate School of Environment and Information Sciences, Yokohama National University, Yokohama 240-8501, Kanagawa, Japan; nakai-satoshi-dc@ynu.ac.jp

\* Correspondence: yu00-fukusaki@city.yokohama.jp; Tel.: +81-45-453-2550

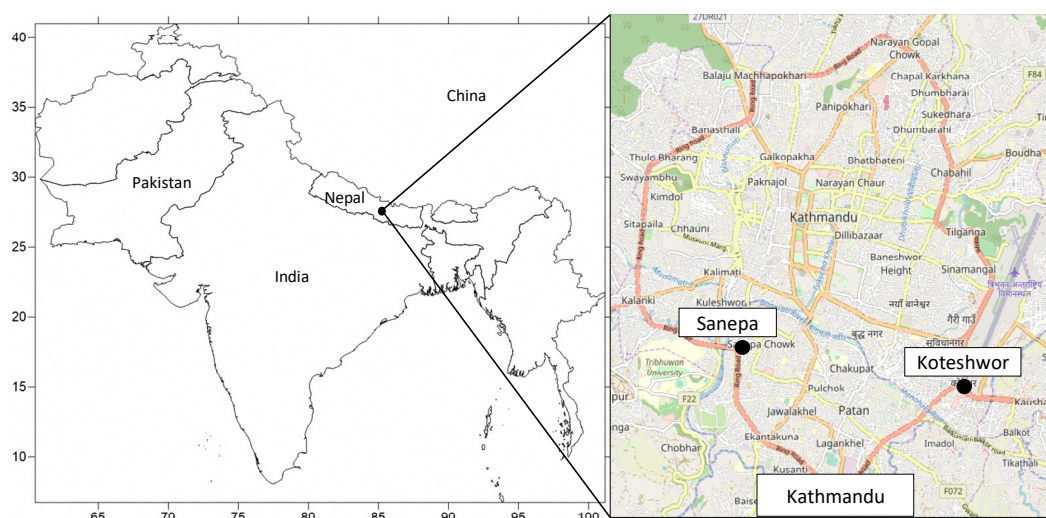

**Figure S1.** Map of Kathmandu, Nepal, including two sampling sites. Reproduced with permission from Japan International Corporation Agency (JICA).

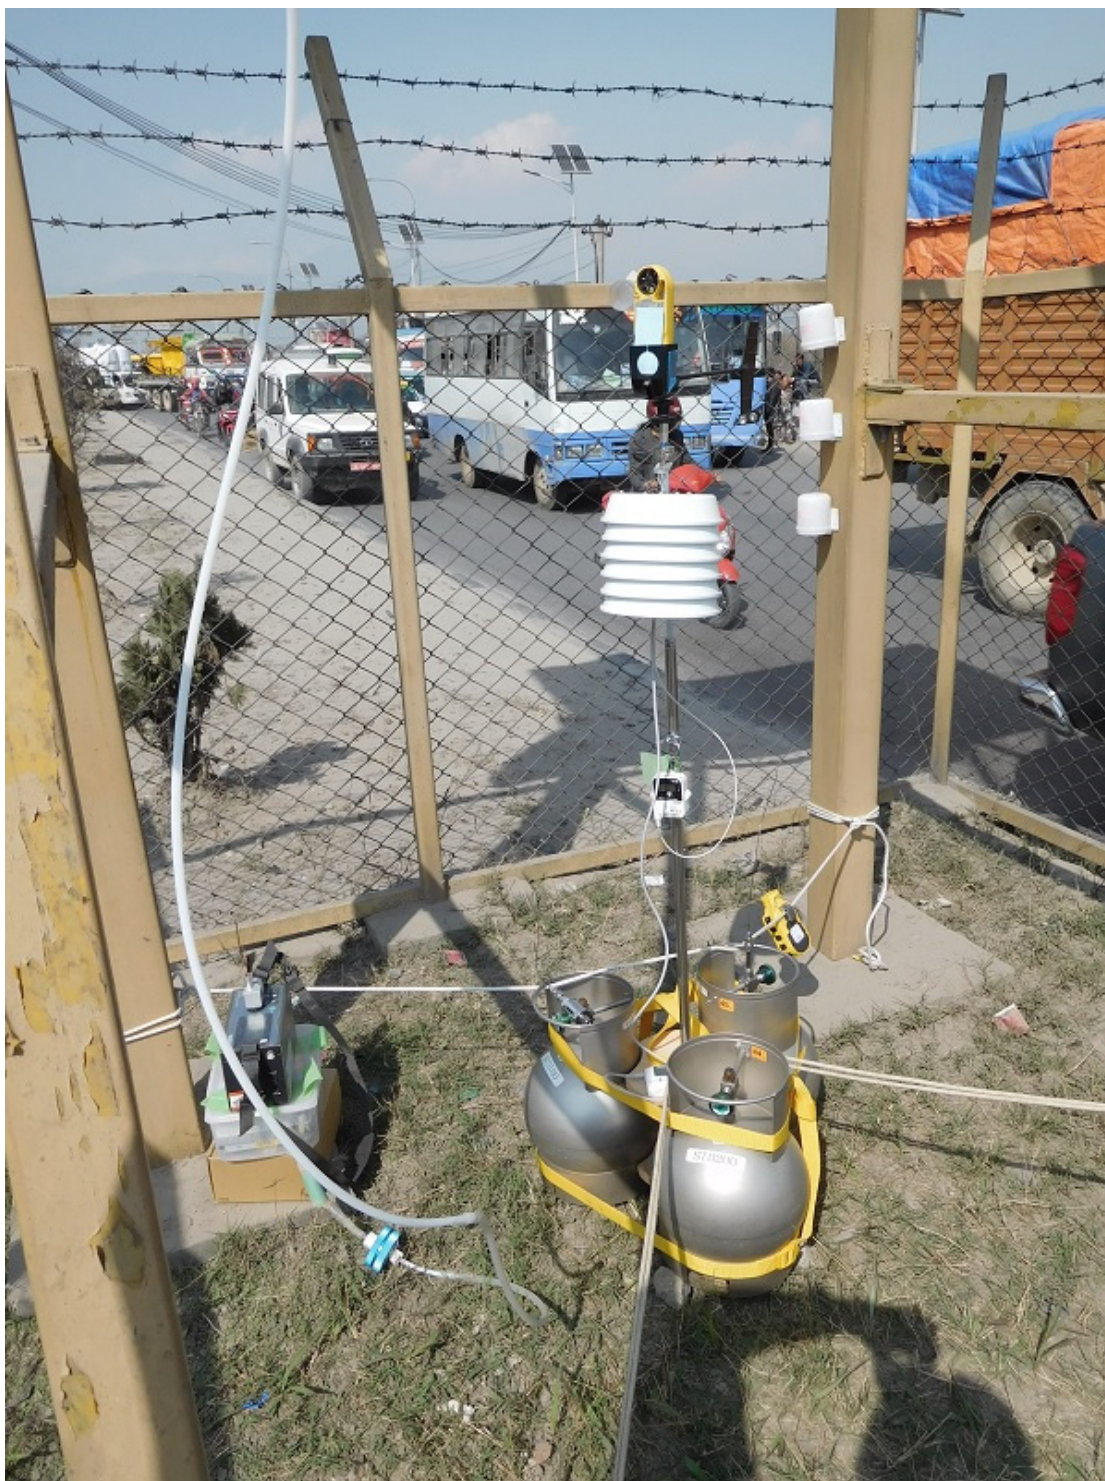

**Figure S2.** Sampling at Koteswor site.



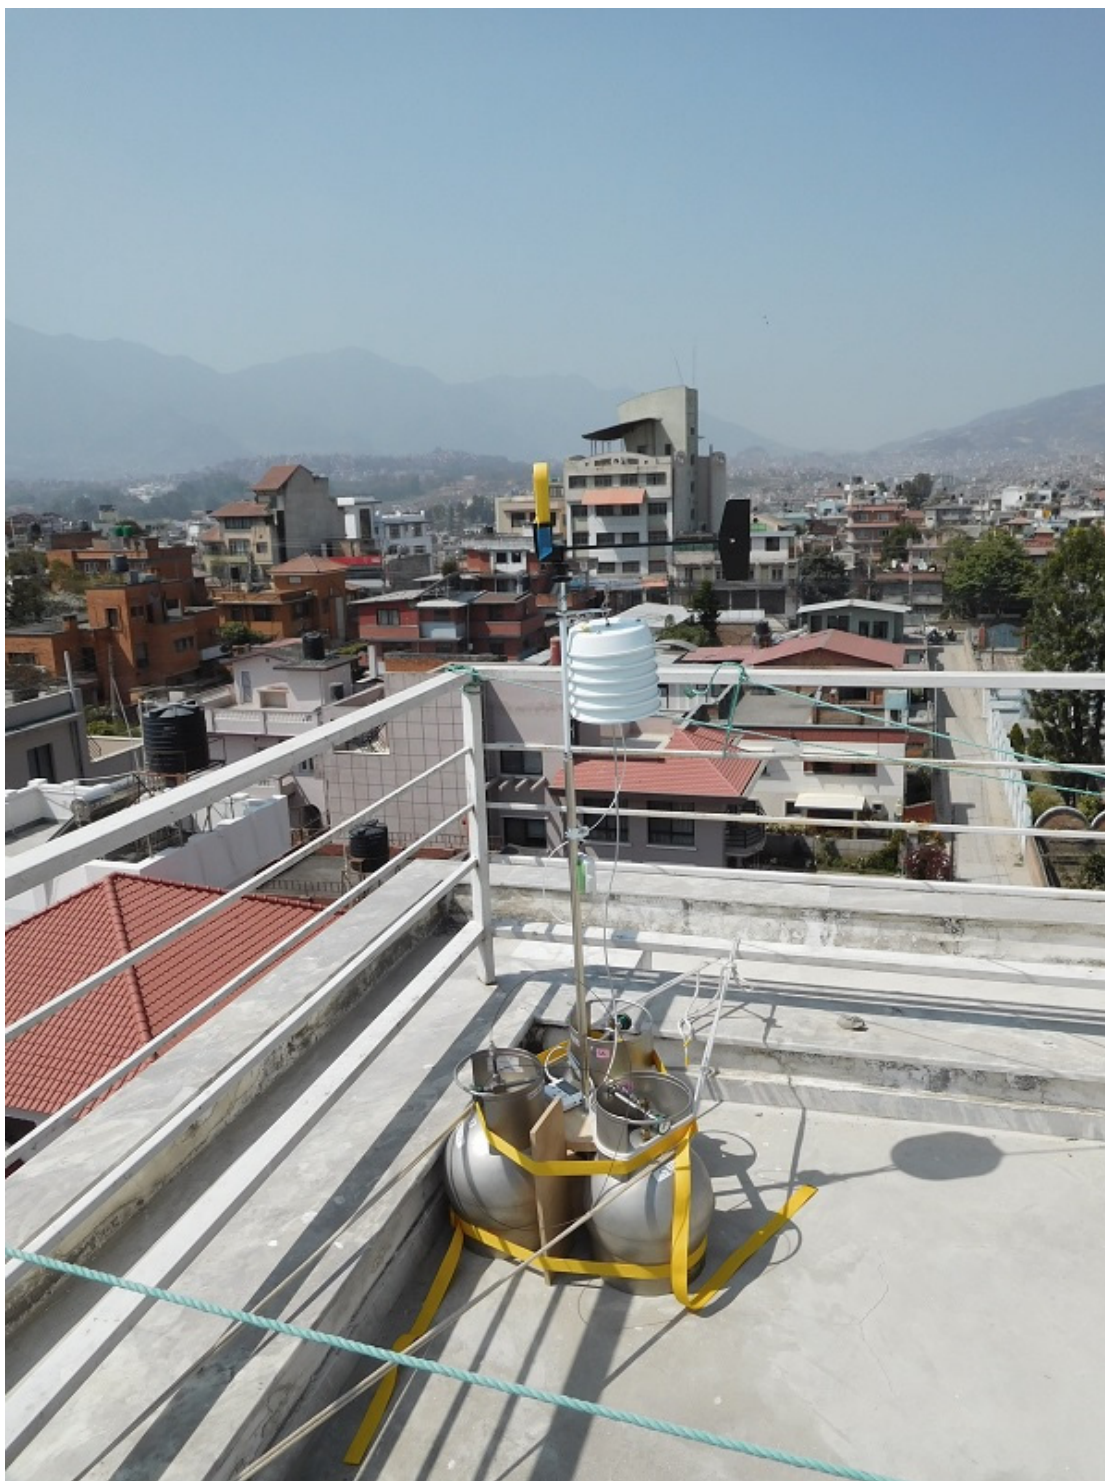

**Figure S3.** Sampling at Sanepa site.
